# Supplementary material for: Salinity Impacts the Functional mcrA and dsrA Gene Abundances in Everglades Marshes
Source: MDPI journal article supplement (doi:10.3390/microorganisms11051180), 2023-04-30
Supplement: s1 [file s1]

### Supplemental Data: Salinity Impacts the functional *mcrA* and *dsrA* gene abundances in Everglades marshes

**Supplemental Table S1:** *mcrA* gene samples from brackish (BW) and freshwater (FW) sites with corresponding year of collection: initial (Y0) or 2 years later (Y2). Samples with no salt treatment (Control) or treated with saltwater pulses (Salt) are indicated in the treatment column. The Chambers indicated as controls were sampled at Y0 and again at Y2 while the treatment chambers were sampled only at Y2. Total Observed OTUs (Operational Taxonomic Units) indicate the total number of reads identified as a taxonomic cluster. Observed Unique OTUs indicate the richness within the sample as explained by the various diversity indices, Chao1, Shannon, Simpson, and Inverse Simpson.

| Group        | Treatment | Chamber | Total Observed OTUs | Unique Observed OTUs | Chao1    | Shannon | Simpson | Inverse Simpson |
|--------------|-----------|---------|---------------------|----------------------|----------|---------|---------|-----------------|
| BW_Y0        | Control   | 3B      | 2740                | 466                  | 1054.09  | 3.88    | 0.91    | 10.63           |
| BW_Y0        | Control   | 8B      | 2943                | 321                  | 321.00   | 4.67    | 0.95    | 20.67           |
| BW_Y2        | Control   | 5B      | 2744                | 567                  | 938.13   | 4.79    | 0.95    | 21.91           |
| BW_Y2        | Control   | 3B      | 2918                | 593                  | 1303.03  | 4.31    | 0.92    | 12.26           |
| BW_Y2        | Control   | 7B      | 2831                | 488                  | 730.31   | 4.43    | 0.94    | 17.29           |
| BW_Y2        | Control   | 8B      | 2616                | 709                  | 1241.05  | 5.47    | 0.99    | 72.84           |
| BW_Y2        | Control   | 1B      | 2741                | 571                  | 995.23   | 4.46    | 0.94    | 16.82           |
| BW_Y2_Saline | Salt      | 11B     | 2810                | 369                  | 369.00   | 4.52    | 0.94    | 16.48           |
| BW_Y2_Saline | Salt      | 12B     | 2747                | 447                  | 920.61   | 3.82    | 0.90    | 9.84            |
| BW_Y2_Saline | Salt      | 13B     | 2780                | 548                  | 968.00   | 4.86    | 0.96    | 27.12           |
| BW_Y2_Saline | Salt      | 16B     | 2766                | 637                  | 1248.85  | 4.63    | 0.95    | 19.41           |
| FW_Y0        | Control   | 2F      | 2879                | 26                   | 26.00    | 3.19    | 0.96    | 22.39           |
| FW_Y0        | Control   | 6F      | 2770                | 534                  | 44194.00 | 5.02    | 0.98    | 42.28           |
| FW_Y0        | Control   | 9F      | 2791                | 296                  | 296.00   | 5.02    | 0.98    | 56.51           |
| FW_Y0        | Control   | 8F      | 2909                | 65                   | 65.00    | 4.09    | 0.98    | 53.40           |
| FW_Y2        | Control   | 2F      | 2639                | 644                  | 1039.00  | 5.46    | 0.99    | 92.54           |
| FW_Y2        | Control   | 8F      | 2880                | 736                  | 91687.00 | 5.61    | 0.99    | 78.04           |
| FW_Y2        | Control   | 9F      | 2784                | 463                  | 742.43   | 4.46    | 0.96    | 22.26           |
| FW_Y2        | Control   | 10F     | 2784                | 171                  | 171.00   | 4.68    | 0.98    | 46.02           |
| FW_Y2        | Control   | 3F      | 2795                | 821                  | 1461.06  | 5.57    | 0.98    | 53.38           |

|                     |         |     |      |     |         |      |      |        |
|---------------------|---------|-----|------|-----|---------|------|------|--------|
| <b>FW_Y2</b>        | Control | 6F  | 2923 | 458 | 458.00  | 5.58 | 0.99 | 111.63 |
| <b>FW_Y2_Saline</b> | Salt    | 12F | 2813 | 308 | 308.00  | 4.97 | 0.98 | 44.41  |
| <b>FW_Y2_Saline</b> | Salt    | 15F | 2916 | 693 | 1254.16 | 5.30 | 0.98 | 47.17  |
| <b>FW_Y2_Saline</b> | Salt    | 16F | 2760 | 546 | 761.47  | 4.52 | 0.94 | 16.46  |
| <b>FW_Y2_Saline</b> | Salt    | 13F | 2707 | 723 | 1392.77 | 5.40 | 0.99 | 69.07  |
| <b>FW_Y2_Saline</b> | Salt    | 14F | 2872 | 767 | 1434.26 | 5.64 | 0.99 | 77.37  |

**Supplemental Table S2:** *dsrA* gene samples from brackish (BW) and freshwater (FW) sites with corresponding year of collection: initial (Y0) or 2 years later (Y2). Samples with no salt treatment (Control) or treated with saltwater pulses (Salt) are indicated in the treatment column. The Chambers indicated as controls were sampled at Y0 and again at Y2 while the treatment chambers were sampled only at Y2. Total Observed OTUs (Operational Taxonomic Units) indicate the total number of reads identified as a taxonomic cluster. Observed Unique OTUs indicate the richness within the sample as explained by the various diversity indices, Chao1, Shannon, Simpson, and Inverse Simpson.

| Group               | Treatment | Chamber | Total Observed OTUs | Observed Unique OTUs | Chao1     | Shannon | Simpson | Inverse Simpson |
|---------------------|-----------|---------|---------------------|----------------------|-----------|---------|---------|-----------------|
| <b>BW_Y0</b>        | Control   | 3B      | 7734                | 2130                 | 5402.49   | 5.95    | 0.98    | 52.90           |
| <b>BW_Y0</b>        | Control   | 5B      | 7591                | 1312                 | 2521.48   | 5.15    | 0.95    | 18.43           |
| <b>BW_Y0</b>        | Control   | 8B      | 7462                | 1071                 | 1071.00   | 5.80    | 0.99    | 88.41           |
| <b>BW_Y0</b>        | Control   | 1B      | 7530                | 651                  | 651.00    | 5.38    | 0.98    | 41.88           |
| <b>BW_Y0</b>        | Control   | 7B      | 7610                | 1530                 | 2927.29   | 5.58    | 0.98    | 40.11           |
| <b>BW_Y2</b>        | Control   | 9B      | 7651                | 1897                 | 3312.70   | 5.86    | 0.98    | 48.64           |
| <b>BW_Y2</b>        | Control   | 5B      | 7372                | 1113                 | 1113.00   | 6.28    | 0.99    | 170.20          |
| <b>BW_Y2</b>        | Control   | 3B      | 7461                | 682                  | 682.00    | 5.87    | 0.99    | 121.60          |
| <b>BW_Y2</b>        | Control   | 7B      | 7828                | 2991                 | 9887.94   | 6.80    | 1.00    | 208.82          |
| <b>BW_Y2</b>        | Control   | 8B      | 7687                | 2394                 | 4847.61   | 6.59    | 0.99    | 130.49          |
| <b>BW_Y2</b>        | Control   | 1B      | 7394                | 1814                 | 602970.00 | 6.32    | 0.99    | 99.53           |
| <b>BW_Y2_Saline</b> | Salt      | 14B     | 7602                | 1144                 | 1144.00   | 6.33    | 0.99    | 179.84          |
| <b>BW_Y2_Saline</b> | Salt      | 11B     | 7379                | 1252                 | 1252.00   | 6.19    | 0.99    | 110.37          |
| <b>BW_Y2_Saline</b> | Salt      | 12B     | 7389                | 1449                 | 2351.21   | 5.55    | 0.97    | 37.78           |
| <b>BW_Y2_Saline</b> | Salt      | 13B     | 7654                | 1177                 | 1177.00   | 6.27    | 0.99    | 120.91          |
| <b>BW_Y2_Saline</b> | Salt      | 16B     | 7682                | 2856                 | 12800.67  | 6.85    | 1.00    | 204.65          |

|                     |         |     |      |      |           |      |      |        |
|---------------------|---------|-----|------|------|-----------|------|------|--------|
| <b>FW_Y0</b>        | Control | 3F  | 7545 | 1721 | 3053.44   | 6.04 | 0.98 | 63.78  |
| <b>FW_Y0</b>        | Control | 2F  | 7476 | 1488 | 2414.88   | 5.87 | 0.99 | 71.32  |
| <b>FW_Y0</b>        | Control | 6F  | 7664 | 1738 | 2831.79   | 6.20 | 0.99 | 118.47 |
| <b>FW_Y0</b>        | Control | 9F  | 7673 | 1328 | 1328.00   | 5.95 | 0.98 | 58.45  |
| <b>FW_Y0</b>        | Control | 8F  | 7503 | 1578 | 3033.00   | 5.68 | 0.97 | 32.65  |
| <b>FW_Y2</b>        | Control | 2F  | 7434 | 1079 | 1445.34   | 4.97 | 0.95 | 20.33  |
| <b>FW_Y2</b>        | Control | 8F  | 7407 | 1151 | 1151.00   | 5.94 | 0.98 | 53.50  |
| <b>FW_Y2</b>        | Control | 9F  | 7709 | 1939 | 4389.58   | 5.58 | 0.95 | 19.04  |
| <b>FW_Y2</b>        | Control | 10F | 7686 | 1806 | 4191.54   | 5.89 | 0.98 | 54.47  |
| <b>FW_Y2</b>        | Control | 3F  | 7472 | 615  | 615.00    | 5.41 | 0.98 | 41.01  |
| <b>FW_Y2</b>        | Control | 6F  | 7637 | 807  | 807.00    | 5.95 | 0.99 | 124.16 |
| <b>FW_Y2_Saline</b> | Salt    | 12F | 7415 | 1535 | 367475.00 | 6.09 | 0.99 | 94.87  |
| <b>FW_Y2_Saline</b> | Salt    | 15F | 7663 | 2161 | 3288.05   | 6.44 | 0.99 | 105.01 |
| <b>FW_Y2_Saline</b> | Salt    | 16F | 7526 | 1705 | 3209.98   | 5.82 | 0.97 | 37.30  |
| <b>FW_Y2_Saline</b> | Salt    | 13F | 7441 | 1576 | 4073.50   | 5.62 | 0.98 | 44.34  |
| <b>FW_Y2_Saline</b> | Salt    | 14F | 7453 | 1260 | 1260.00   | 6.07 | 0.98 | 58.25  |

**Supplemental Table S3:** Summary of soil physiochemical properties of brackish and freshwater sites collected from porewater, and top 10 cm of soil cores at year 2. Welch's T-Test using alpha = 0.05. Significant differences are bolded.

|                               | Brackish Samples |           |              | Freshwater Samples |           |              |
|-------------------------------|------------------|-----------|--------------|--------------------|-----------|--------------|
|                               | Mean             |           | Significance | Mean               |           | Significance |
| Extracellular Enzyme Activity | Control          | Treatment | p value =    | Control            | Treatment | p value =    |
| Alkaline phosphatase          | 0.41             | 6.99E-05  | 0.36         | 3.82E-03           | 0.01      | 0.34         |
| Acid phosphatase              | 2.80             | 2.61      | 0.87         | 3.89               | 3.51      | 0.83         |
| Arylsulfatase                 | 2.07             | 2.16      | 0.88         | 3.26               | 3.35      | 0.93         |
| Beta-1-4-glucosidase          | 1.68             | 1.87      | 0.67         | 5.91               | 3.46      | 0.11         |
| Beta-1-4-cellobiosidase       | 0.23             | 0.24      | 0.75         | 2.66               | 0.62      | 0.28         |
| Leucine amino peptidase       | 0.01             | 0.00      | 0.36         | 0.01               | 0.04      | 0.10         |

| <b>Bulk soil</b>                   |         |         |               |        |         |               |
|------------------------------------|---------|---------|---------------|--------|---------|---------------|
| <b>Phosphorus</b>                  | 522.28  | 442.37  | 0.19          | 500.04 | 569.71  | 0.16          |
| <b>Nitrogen</b>                    | 2.47    | 2.17    | 0.10          | 3.25   | 3.29    | 0.74          |
| <b>Carbon</b>                      | 36.66   | 30.70   | 0.34          | 35.18  | 25.16   | < <b>0.05</b> |
| <b>Porewater Biogeochemistry</b>   |         |         |               |        |         |               |
| <b>Temperature</b>                 | 29.10   | 29.26   | 0.70          | 27.49  | 27.84   | 0.46          |
| <b>Conductivity</b>                | 19.32   | 26.23   | < <b>0.05</b> | 0.51   | 3.80    | < <b>0.05</b> |
| <b>Salinity</b>                    | 11.49   | 16.00   | < <b>0.05</b> | 0.24   | 2.03    | < <b>0.05</b> |
| <b>Alkalinity</b>                  | 597.17  | 322.02  | < <b>0.05</b> | 155.00 | 165.67  | 0.17          |
| <b>Chlorine</b>                    | 6259.02 | 8937.19 | < <b>0.05</b> | 56.79  | 1230.81 | < <b>0.05</b> |
| <b>DOC</b>                         | 135.37  | 89.04   | < <b>0.05</b> | 22.83  | 22.62   | 0.94          |
| <b>pH</b>                          | 7.56    | 7.51    | 0.29          | 7.30   | 7.60    | < <b>0.05</b> |
| <b>NH<sub>4</sub><sup>+</sup></b>  | 5.37    | 2.47    | < <b>0.05</b> | 0.45   | 0.93    | 0.07          |
| <b>SO<sub>4</sub><sup>2-</sup></b> | 362.81  | 964.63  | < <b>0.05</b> | 0.10   | 150.03  | < <b>0.05</b> |
| <b>TDN</b>                         | 8.84    | 4.58    | < <b>0.05</b> | 1.09   | 1.57    | < <b>0.05</b> |
| <b>SRP</b>                         | 5.47    | 2.76    | < <b>0.05</b> | 0.04   | 0.04    | 0.72          |
| <b>TDP</b>                         | 8.90    | 3.95    | < <b>0.05</b> | 0.32   | 0.34    | 0.54          |
| <b>HS<sup>-</sup></b>              | 3.37    | 1.45    | < <b>0.05</b> | 0      | 0.08    | < <b>0.05</b> |

**Supplemental Table S4:** Summary of soil physiochemical properties comparing brackish and freshwater sites collected from porewater, and top 10 cm of soil cores at year 2 timepoint of study. Welch's T-Test using alpha = 0.05. Significant differences are bolded.

| <b>Site Samples</b>                  |             |           |                     |
|--------------------------------------|-------------|-----------|---------------------|
|                                      | <b>Mean</b> |           | <b>Significance</b> |
| <b>Extracellular Enzyme Activity</b> | <b>BW</b>   | <b>FW</b> | <b>p value =</b>    |
| <b>Alkaline phosphatase</b>          | 0.21        | 0.01      | 0.35                |
| <b>Acid phosphatase</b>              | 2.70        | 3.66      | 0.39                |
| <b>Arylsulfatase</b>                 | 2.12        | 3.32      | 0.07                |
| <b>Beta-1-4-glucosidase</b>          | 1.78        | 4.44      | < <b>0.05</b>       |
| <b>Beta-1-4-cellobiosidase</b>       | 0.23        | 1.43      | 0.10                |
| <b>Leucine amino peptidase</b>       | 4.37E-03    | 0.03      | 0.06                |

| <b>Bulk soil</b>                   |         |        |               |
|------------------------------------|---------|--------|---------------|
| <b>Phosphorus</b>                  | 482.32  | 541.84 | 0.12          |
| <b>Nitrogen</b>                    | 2.32    | 3.27   | < <b>0.05</b> |
| <b>Carbon</b>                      | 33.68   | 29.17  | 0.21          |
| <b>Porewater Biogeochemistry</b>   |         |        |               |
| <b>Temperature</b>                 | 29.18   | 27.70  | < <b>0.05</b> |
| <b>Conductivity</b>                | 22.78   | 2.49   | < <b>0.05</b> |
| <b>Salinity</b>                    | 13.74   | 1.32   | < <b>0.05</b> |
| <b>Alkalinity</b>                  | 459.59  | 161.40 | < <b>0.05</b> |
| <b>Chlorine</b>                    | 7598.10 | 761.20 | < <b>0.05</b> |
| <b>DOC</b>                         | 112.20  | 22.70  | < <b>0.05</b> |
| <b>pH</b>                          | 7.54    | 7.48   | 0.44          |
| <b>NH<sub>4</sub><sup>+</sup></b>  | 3.92    | 0.74   | < <b>0.05</b> |
| <b>SO<sub>4</sub><sup>2-</sup></b> | 663.72  | 90.06  | < <b>0.05</b> |
| <b>TDN</b>                         | 6.71    | 1.38   | < <b>0.05</b> |
| <b>SRP</b>                         | 4.11    | 0.04   | < <b>0.05</b> |
| <b>TDP</b>                         | 6.43    | 0.34   | < <b>0.05</b> |
| <b>HS<sup>-</sup></b>              | 2.41    | 0.05   | < <b>0.05</b> |

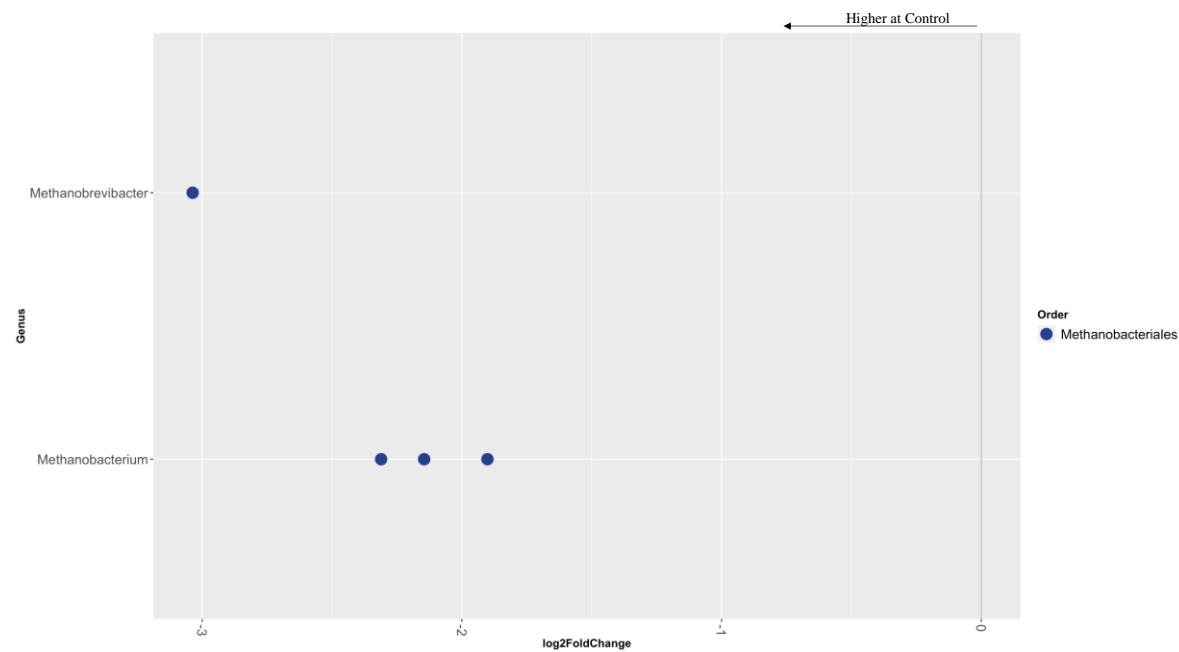

**Supplemental Figure S1:** Differentially abundant genera found at the Brackish site. Differential abundance plots between year 2 samples - control and saltwater treatment. Negative log fold changes represent significant differential abundance at the control samples. Decreases in abundance were observed in the Methanobacteriales Order after treatment.

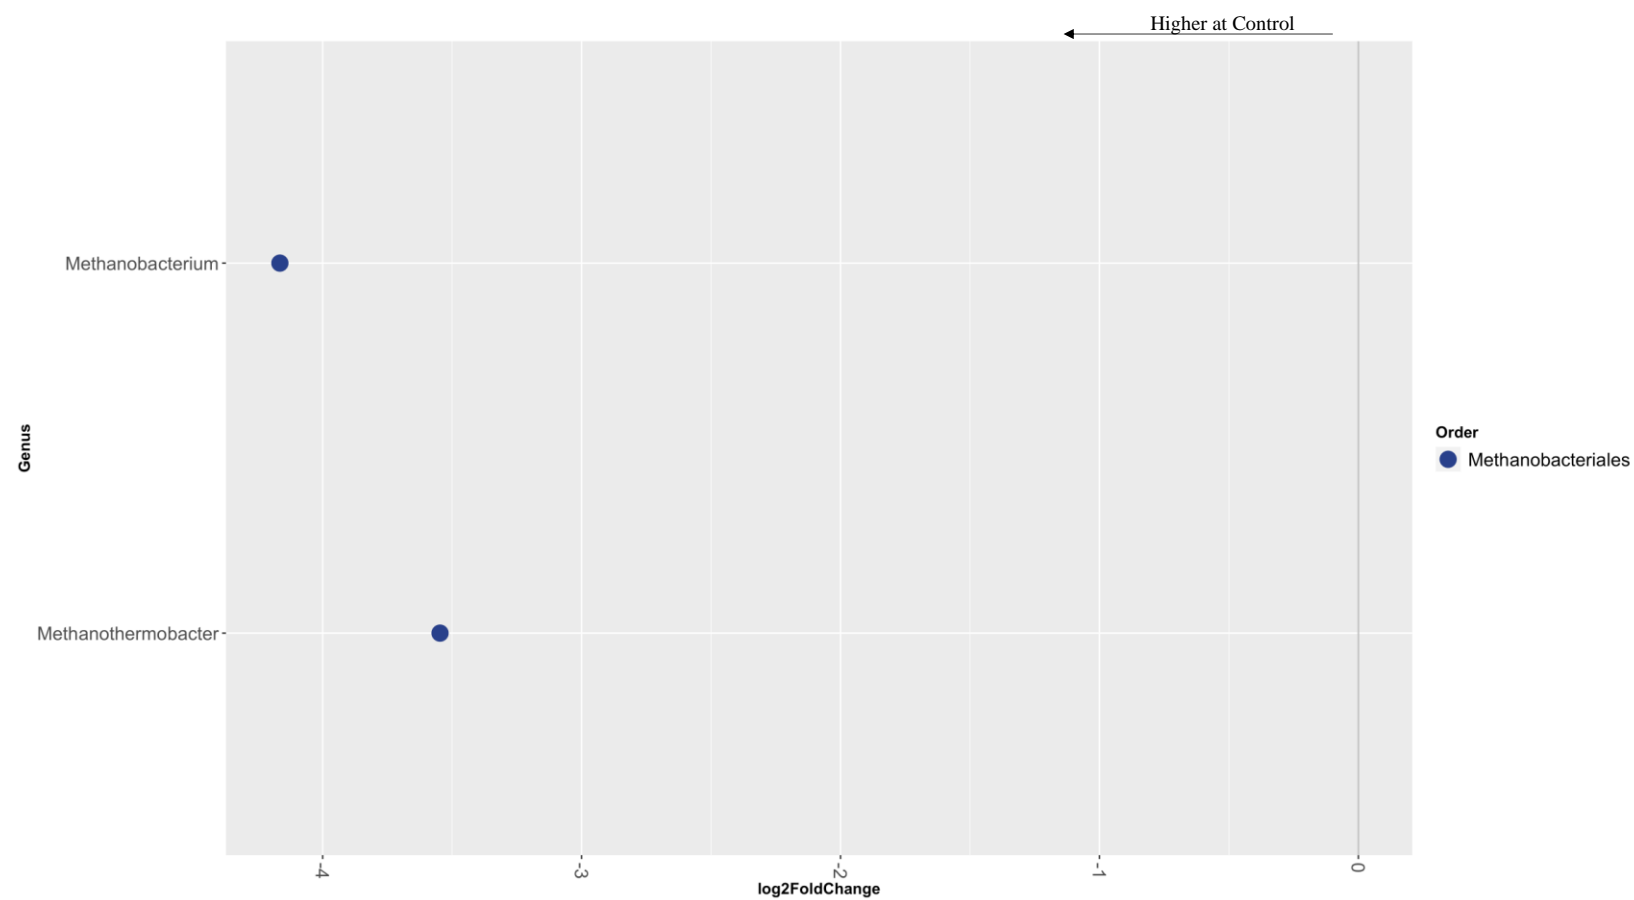

**Supplemental Figure S2:** Differentially abundant genera found at the Freshwater site. Differential abundance plots between year 2 samples - control and saltwater treatment. Negative log fold changes represent significant differential abundance at the control samples. Decreases in abundance were observed in the Methanobacteriales Order after treatment.
